# Supplementary material
Source: Research Square preprint supplement (doi:10.21203/rs.3.rs-9492264/v1)
Supplement: Supplementary file 1 [file 3fde72304ed032851b48c77e.pdf]

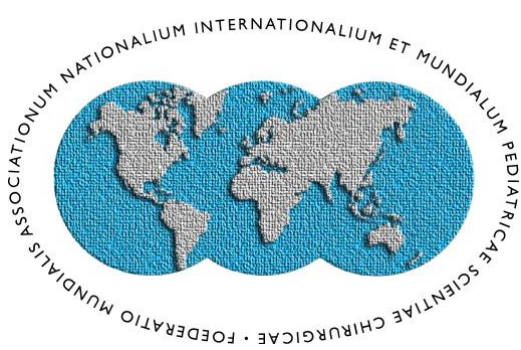

World Federation of Associations of Pediatric Surgeons  
Mandachstrasse 52, 8155 Niederhasli, Switzerland  
wofaps2023@gmail.com

To  
Dr Satoshi Ieiri

Your Manuscript Submission 8th World Congress of Pediatric Surgery

Dear Dr Ieiri,

Thank you for submitting your manuscript „Anatomical location of small bowel atresia independently predicts preterm delivery: A two-center study in southern Japan” for consideration in the WOFAPS 2025 Conference Proceedings.

The WOFAPS Publication Committee is delighted to acknowledge the final decision on your manuscript.

The decision is “**acceptance**”.

Please submit your manuscript via the „Pediatric Surgery International” website.

<https://link.springer.com/journal/383>

Please choose the collection „**WOFAPS 2025 Conference Proceedings**” under „Details” during the submission process.

Make sure that your files are designed accordingly to the PSI authors guidelines. Please also make sure that the manuscript fulfils the required language standards.

Prof. Udo Rolle  
Chair WOFAPS Publication Committee  
WOFAPS President

Frankfurt, 21st April 2026

## World Federation of Associations of Paediatric Surgeons

### OFFICE BEARERS (2026-2029)

#### President

Prof. Udo Rolle (Germany)

#### President Elect

Prof. Amadeo Zanotti (Paraguay)

#### Vice President

Prof. Cenk Buyukunal (Türkiye)

#### Past President

Prof. Alp Numanoglu (South Africa)

#### Foundation's President

Prof. Sameh Shehata (Egypt)

#### Secretary General/ Treasurer

Prof. Shilpa Sharma (India)

#### Assistant Secretary

Prof. Orkan Ergun (Türkiye)

#### Honorary Secretary General

Prof. José Boix-Ochoa (Spain)

#### Executive Members

Prof. Patrick Chung (Hong Kong SAR China)

*Asia*

Prof. Gunadi (Indonesia)

*Asia – Indonesia*

Prof. Satoshi Ieiri (Japan)

*Asia*

Prof. Yosra Kerkeni (Tunisia)

*Middle East*

Prof. Samad Shaik (South Africa)

*Africa*

Prof. Steve Rothenberg (USA)

*North America*

Prof. Max Schlobach (Brasil)

*Central & South America / Caribbean*

Prof. Ricardo Villalpando (Mexico)

*Central & South America / Caribbean*

Prof. Orkan Ergun (Türkiye)

*Europe*

Prof. Michal Rygl (Czech Republic)

*Europe*

Prof. Sani Molagool (Thailand)

*Congress*

#### Webmaster

Prof. Mahmoud Elfiky (Egypt)
